# Supplementary material for: An Explainable Stacked Ensemble Model for Static Route‐Free Estimation of Time of Arrival
Source: Hindawi journal article supplement (doi:10.1155/2024/9301691), 2024-01-01
Supplement: f1 [file 9301691.f1.zip]

Archive with 2 entries (2 files):
- Supplementary file-9301691.docx
- supplementary_graphics.IS_ACTUALLY_ZIP (1) (extract.me).zip
