# Supplementary material for: An Explainable Stacked Ensemble Model for Static Route‐Free Estimation of Time of Arrival
Source: Hindawi journal article supplement (doi:10.1155/2024/9301691), 2024-01-01
Supplement: f1 [file 9301691.f1.zip › Supplementary file-9301691.docx]

# Supplementary Material

In Figure [S1,](#_bookmark21) we visualize the LIME explanations generated via the proposed joining methods for SC1, SC3, and SC4; in Figure [S2,](#_bookmark22) we do the same for the SHAP explanations. Figure S3 shows the content of Figure [10](#_bookmark19) for LIME.

Pickup X Pickup Y Dropoff X Dropoff Y Month Week Weekday

5-minute time-bin

Distance Temperature

SC1: Off City-Center vs. City-Center


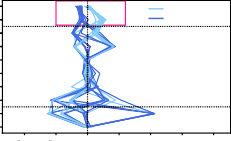
Off city-center City-center

Here, we expect a difference between the two scenario forms.

500 250 0 250 500 750 1000

BL: Feature importance by LIME

Pickup X Pickup Y Dropoff X Dropoff Y Month Week Weekday

5-minute time-bin

Distance Temperature

SC1: Off City-Center vs. City-Center

JM1: Joined feature importance by LIME


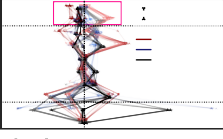


Off city-center

City-center

L1-RF

L1-XGBoost L1-FCNN

Here, we expect a difference between the two scenario forms.

500 250 0 250 500 750 1000

Pickup X Pickup Y Dropoff X Dropoff Y Month Week Weekday

5-minute time-bin

Distance Temperature

SC1: Off City-Center vs. City-Center


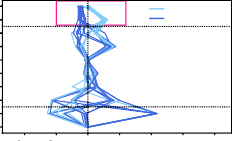
Off city-center City-center

Here, we expect a difference between the two scenario forms.

500 250 0 250 500 750 1000

JM2: Joined feature importance by LIME

Pickup X Pickup Y Dropoff X Dropoff Y Month Week Weekday

5-minute time-bin

Distance Temperature

SC1: Off City-Center vs. City-Center


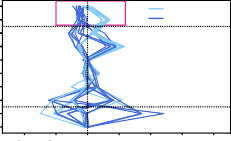
Off city-center City-center

Here, we expect a difference between the two scenario forms.

500 250 0 250 500 750 1000

JM3: Joined feature importance by LIME

Pickup X Pickup Y Dropoff X Dropoff Y Month Week Weekday

5-minute time-bin

Distance Temperature

SC3: Low vs. High Temperature


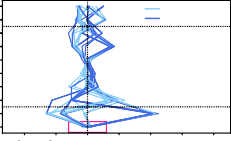
Low temperature High temperature

Here, we expect a difference between the two scenario forms.

500 250 0 250 500 750 1000

BL: Feature importance by LIME

Pickup X Pickup Y Dropoff X Dropoff Y Month Week Weekday

5-minute time-bin

Distance Temperature

SC3: Low vs. High Temperature

JM1: Joined feature importance by LIME


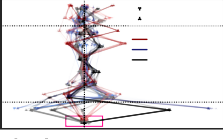


Low temperature

High temperature

L1-RF

L1-XGBoost L1-FCNN

Here, we expect a difference between the two scenario forms.

500 250 0 250 500 750 1000

Pickup X Pickup Y Dropoff X Dropoff Y Month Week Weekday

5-minute time-bin

Distance Temperature

SC3: Low vs. High Temperature


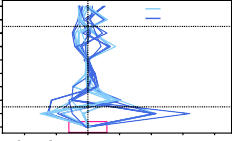
Low temperature High temperature

Here, we expect a difference between the two scenario forms.

500 250 0 250 500 750 1000

JM2: Joined feature importance by LIME

Pickup X Pickup Y Dropoff X Dropoff Y Month Week Weekday

5-minute time-bin

Distance Temperature

SC3: Low vs. High Temperature


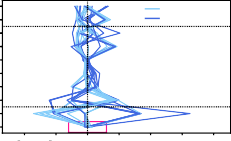
Low temperature High temperature

Here, we expect a difference between the two scenario forms.

500 250 0 250 500 750 1000

JM3: Joined feature importance by LIME

Pickup X Pickup Y Dropoff X Dropoff Y Month Week

SC4: Low vs. High Distance


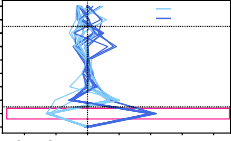
Low distance High distance

Pickup X Pickup Y Dropoff X Dropoff Y Month Week

SC4: Low vs. High Distance

Pickup X Pickup Y Dropoff X Dropoff Y Month Week


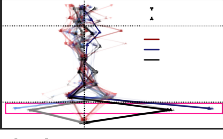


Low distance

High distance

L1-RF

L1-XGBoost L1-FCNN

Here, we expect a difference between the two scenario forms.

500 250 0 250 500 750 1000

SC4: Low vs. High Distance


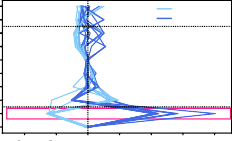
Low distance High distance

Pickup X Pickup Y Dropoff X Dropoff Y Month Week

SC4: Low vs. High Distance


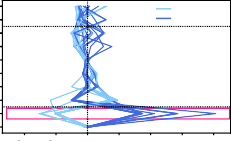
Low distance High distance

Weekday 5-minute time-bin

Distance Temperature

Here, we expect a

difference between the two scenario forms.

500 250 0 250 500 750 1000

BL: Feature importance by LIME

Weekday

5-minute time-bin

Distance Temperature

JM1: Joined feature importance by LIME

Weekday 5-minute time-bin

Distance Temperature

Here, we expect a

difference between the two scenario forms.

500 250 0 250 500 750 1000

JM2: Joined feature importance by LIME

Weekday 5-minute time-bin

Distance Temperature

Here, we expect a

difference between the two scenario forms.

500 250 0 250 500 750 1000

JM3: Joined feature importance by LIME

Figure S1: Content of Figure [8](#_bookmark16) for SC1, SC3, and SC4.

Pickup X Pickup Y Dropoff X Dropoff Y Month Week Weekday

5-minute time-bin

Distance Temperature

SC1: Off City-Center vs. City-Center


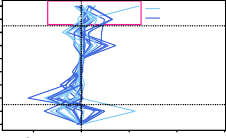
Off city-center City-center

Here, we expect a difference between the two scenario forms.

500 0 500 1000 1500

BL: Feature contribution by SHAP

Pickup X Pickup Y Dropoff X Dropoff Y Month Week Weekday

5-minute time-bin

Distance Temperature

SC1: Off City-Center vs. City-Center

JM1: Joined feature contribution by SHAP


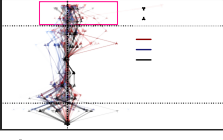


Off city-center

City-center

L1-RF

L1-XGBoost L1-FCNN

Here, we expect a difference between the two scenario forms.

500 0

500 1000 1500

Pickup X Pickup Y Dropoff X Dropoff Y Month Week Weekday

5-minute time-bin

Distance Temperature

SC1: Off City-Center vs. City-Center


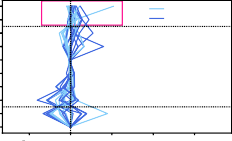
Off city-center City-center

Here, we expect a difference between the two scenario forms.

500 0 500 1000 1500

JM2: Joined feature contribution by SHAP

Pickup X Pickup Y Dropoff X Dropoff Y Month Week Weekday

5-minute time-bin

Distance Temperature

SC1: Off City-Center vs. City-Center


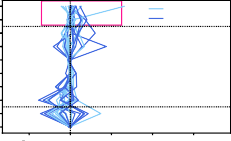
Off city-center City-center

Here, we expect a difference between the two scenario forms.

500 0 500 1000 1500

JM3: Joined feature contribution by SHAP

Pickup X Pickup Y Dropoff X Dropoff Y Month Week Weekday

5-minute time-bin

Distance Temperature

SC3: Low vs. High Temperature


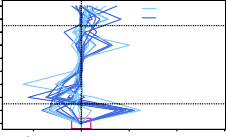
Low temperature High temperature

Here, we expect a difference between the two scenario forms.

500 0 500 1000 1500

BL: Feature contribution by SHAP

Pickup X Pickup Y Dropoff X Dropoff Y Month Week Weekday

5-minute time-bin

Distance Temperature

SC3: Low vs. High Temperature

JM1: Joined feature contribution by SHAP


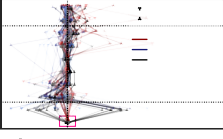


Low temperature

High temperature

L1-RF

L1-XGBoost L1-FCNN

Here, we expect a difference between the two scenario forms.

500 0

500 1000 1500

Pickup X Pickup Y Dropoff X Dropoff Y Month Week Weekday

5-minute time-bin

Distance Temperature

SC3: Low vs. High Temperature


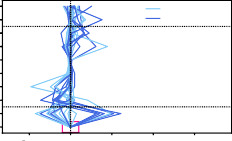
Low temperature High temperature

Here, we expect a difference between the two scenario forms.

500 0 500 1000 1500

JM2: Joined feature contribution by SHAP

Pickup X Pickup Y Dropoff X Dropoff Y Month Week Weekday

5-minute time-bin

Distance Temperature

SC3: Low vs. High Temperature


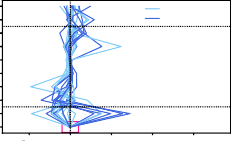
Low temperature High temperature

Here, we expect a difference between the two scenario forms.

500 0 500 1000 1500

JM3: Joined feature contribution by SHAP

Pickup X Pickup Y Dropoff X Dropoff Y Month Week

SC4: Low vs. High Distance


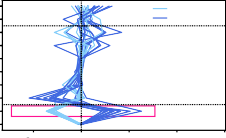
Low distance High distance

Pickup X Pickup Y Dropoff X Dropoff Y Month Week

SC4: Low vs. High Distance

Pickup X Pickup Y Dropoff X Dropoff Y Month Week


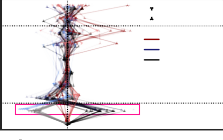


Low distance

High distance

L1-RF

L1-XGBoost L1-FCNN

Here, we expect a difference between the two scenario forms.

500 0

500 1000 1500

SC4: Low vs. High Distance


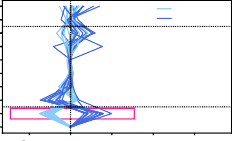
Low distance High distance

Pickup X Pickup Y Dropoff X Dropoff Y Month Week

SC4: Low vs. High Distance


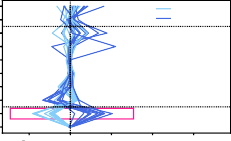
Low distance High distance

Weekday 5-minute time-bin

Distance Temperature

Here, we expect a

difference between the two scenario forms.

500 0 500 1000 1500

BL: Feature contribution by SHAP

Weekday

5-minute time-bin

Distance Temperature

JM1: Joined feature contribution by SHAP

Weekday

5-minute time-bin

Distance Temperature

Here, we expect a

difference between the two scenario forms.

500 0 500 1000 1500

JM2: Joined feature contribution by SHAP

Weekday

5-minute time-bin

Distance Temperature

Here, we expect a

difference between the two scenario forms.

500 0 500 1000 1500

JM3: Joined feature contribution by SHAP

Figure S2: Content of Figure [9](#_bookmark18) for SC1, SC3, and SC4.

100


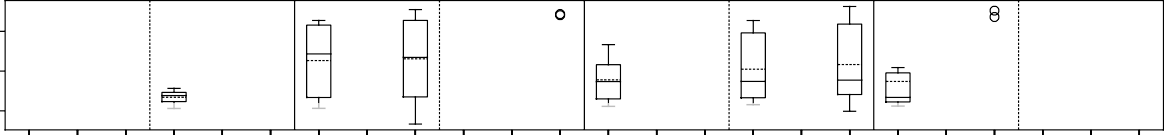

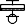

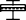

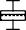

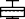

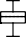

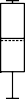

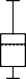

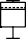

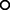

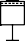

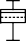

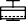

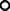

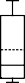

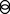

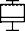

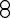

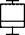

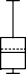

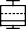

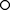

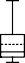


SC1L

SC1H

SC2L

SC2H

SC3L

SC3H

SC4L

SC4H

Pickup X

0


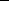
100

200


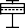

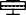

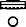

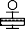

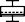

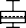

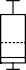

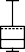

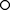

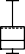

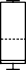

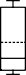

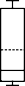

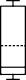

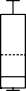

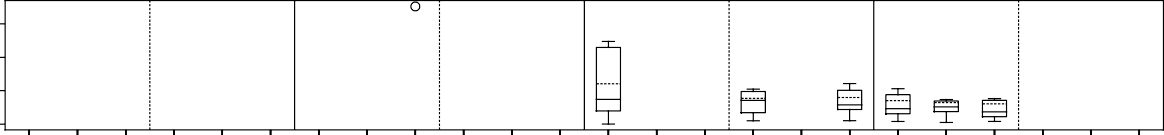

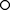

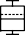

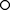

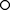

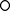

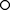

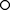

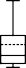

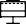

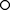

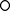

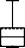

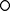


SC1L

SC1H

SC2L

SC2H

SC3L

SC3H

SC4L

SC4H

100

Pickup Y

0


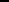
100

200


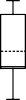

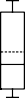

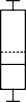

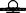

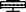

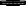

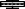

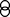

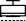

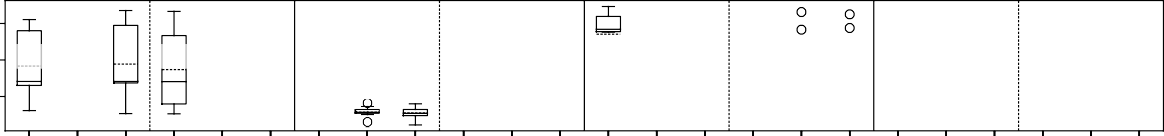

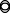

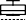

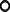

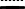

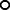

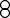

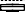

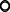

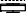

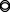

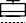

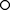


SC1L

SC1H

SC2L

SC2H

SC3L

SC3H

SC4L

SC4H

5-minute time-bin

0

200

25

SC1L

SC1H

SC2L

SC2H

SC3L

SC3H

SC4L

SC4H

Temperature

0

25

1000

SC1L

SC1H

SC2L

SC2H

SC3L

SC3H

SC4L

SC4H

500

Distance

0

500

BL JM2 JM3 BL JM2 JM3 BL JM2 JM3 BL JM2 JM3 BL JM2 JM3 BL JM2 JM3 BL JM2 JM3 BL JM2 JM3

Figure S3: Content of Figure [10](#_bookmark19) for LIME
