# Supplementary figures and images for: An Explainable Stacked Ensemble Model for Static Route‐Free Estimation of Time of Arrival
Source: Hindawi journal article supplement (doi:10.1155/2024/9301691), 2024-01-01

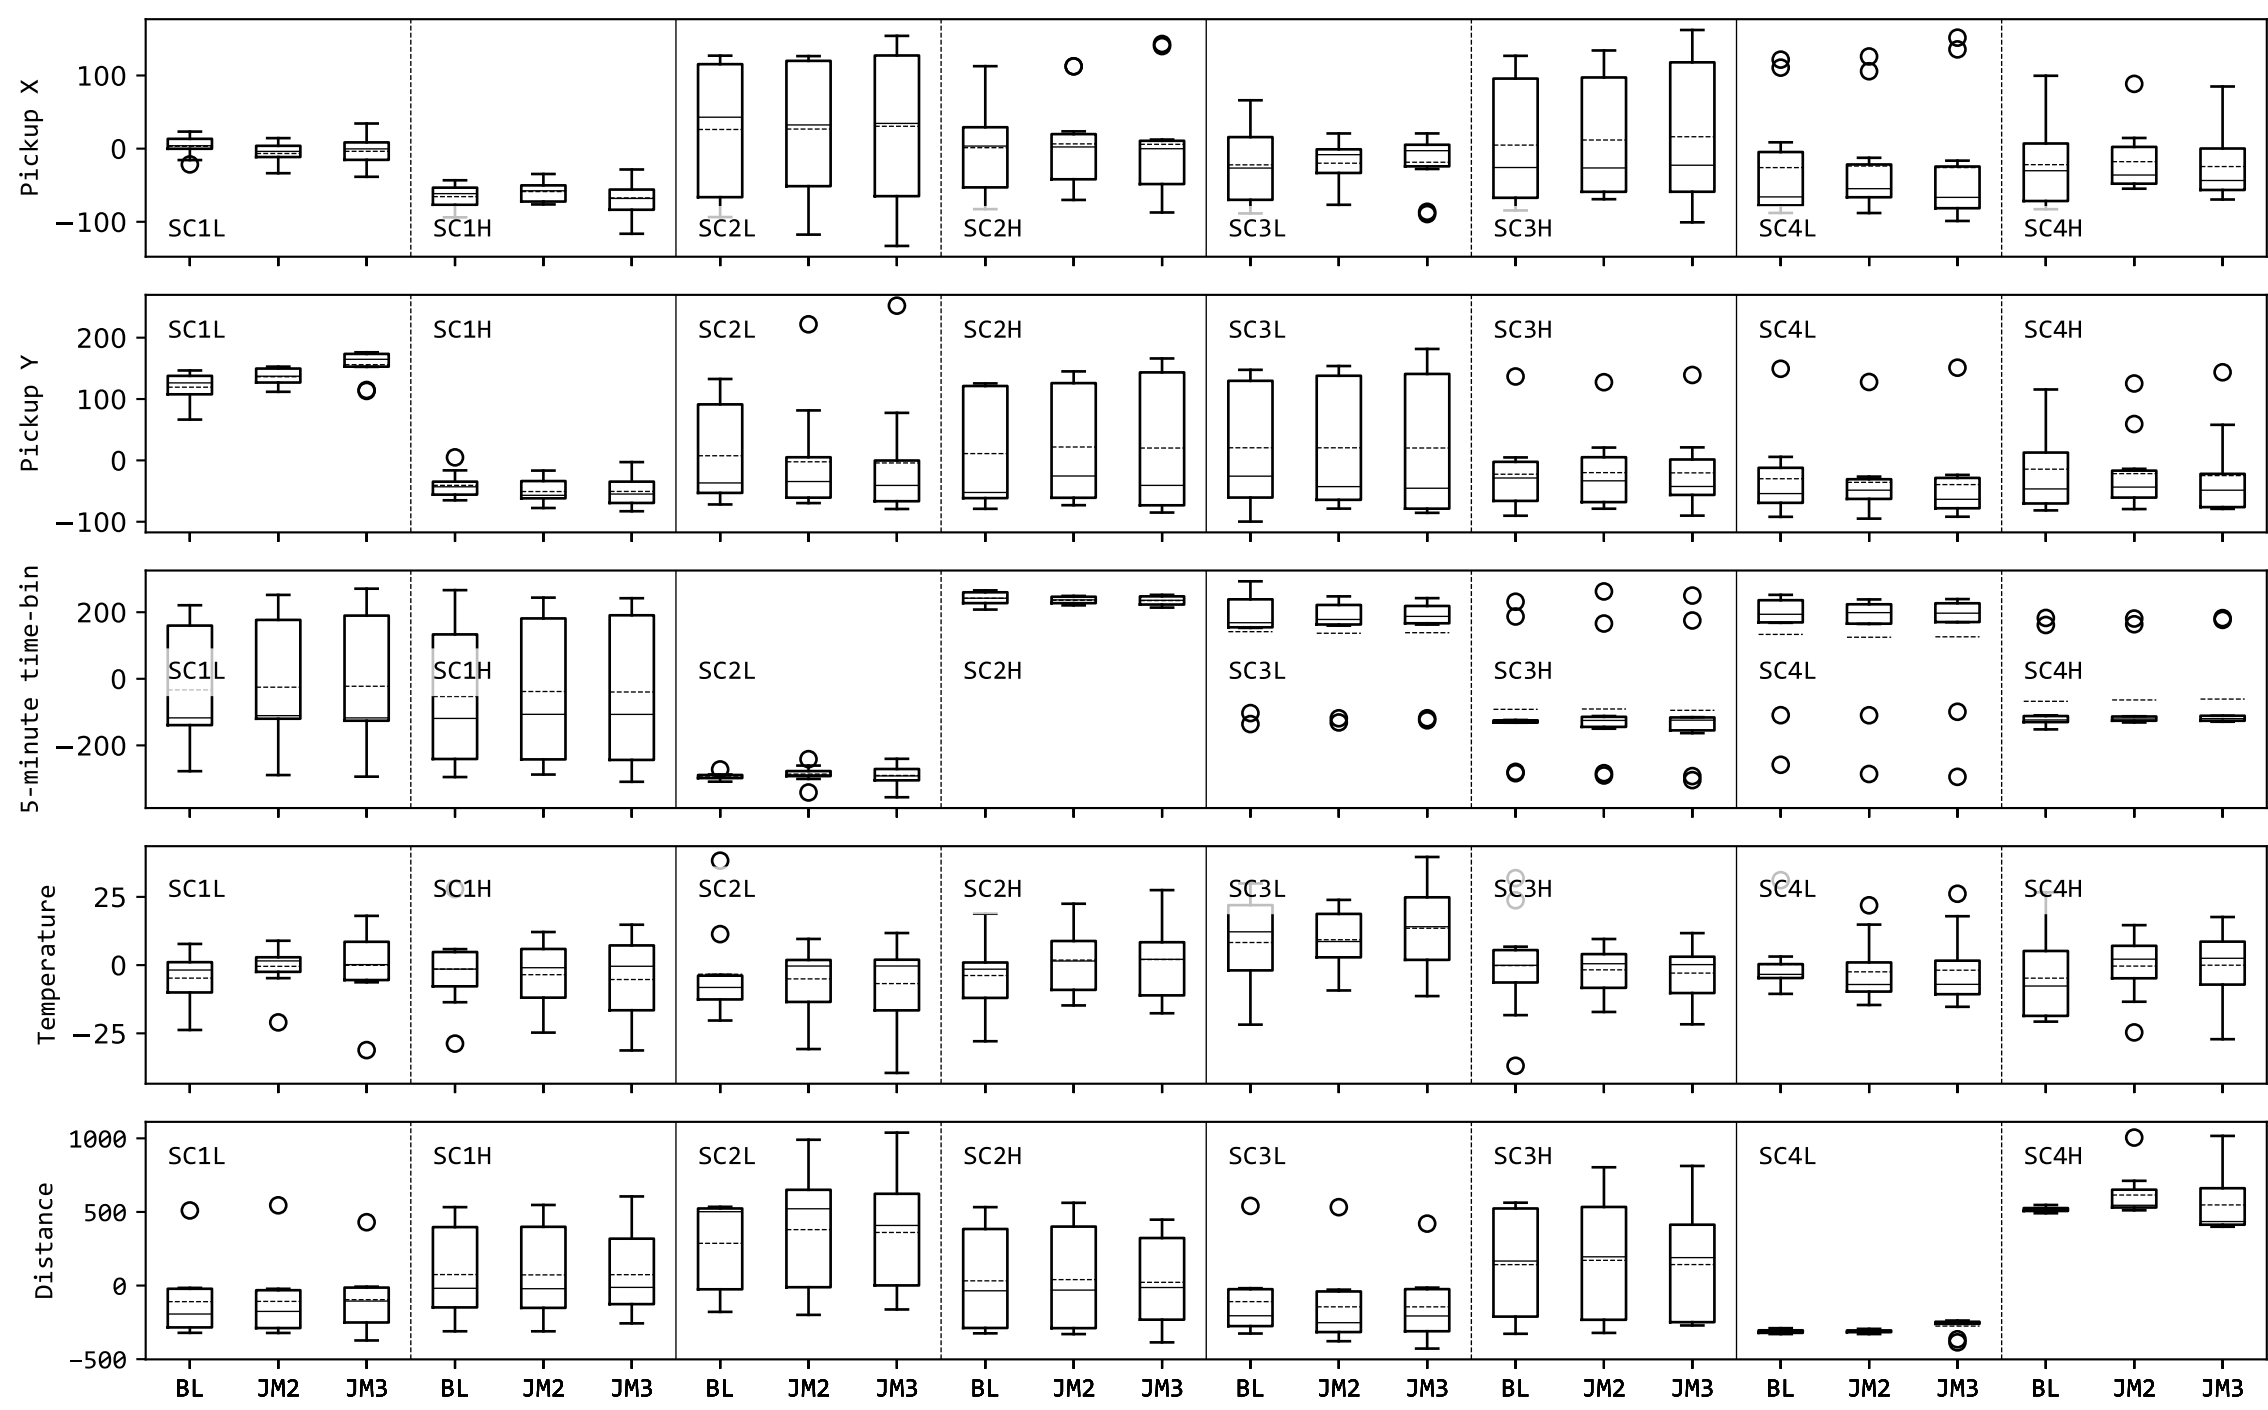

Supplement: f1 [file 9301691.f1.zip]

## SC1: Off City-Center vs. City-Center

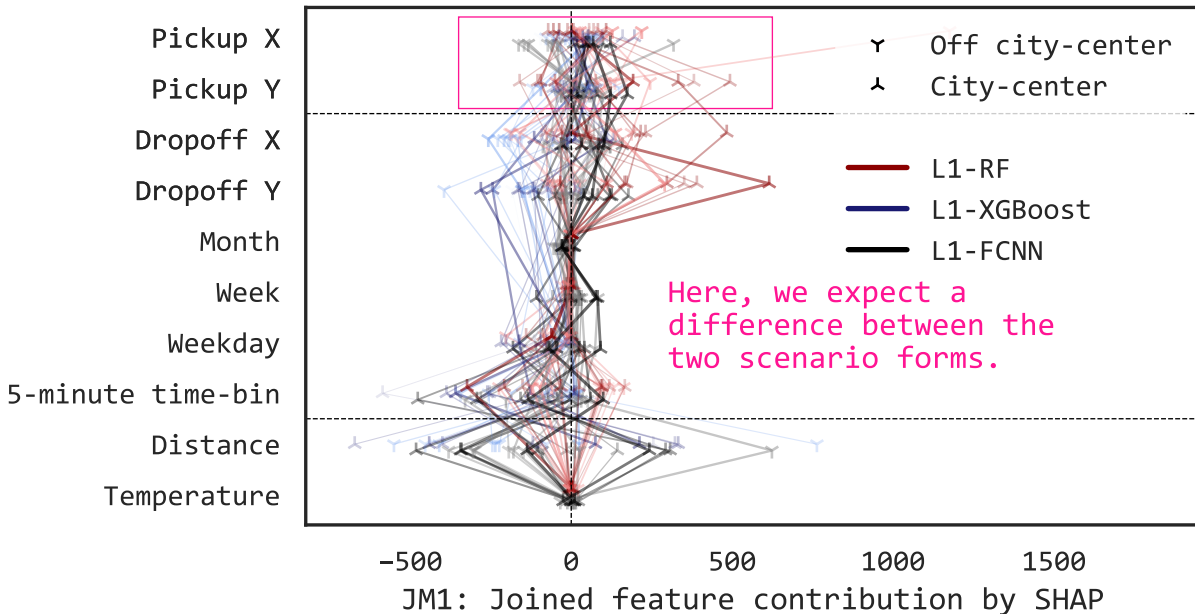

Supplement: f1 [file 9301691.f1.zip]

### SC3: Low vs. High Temperature

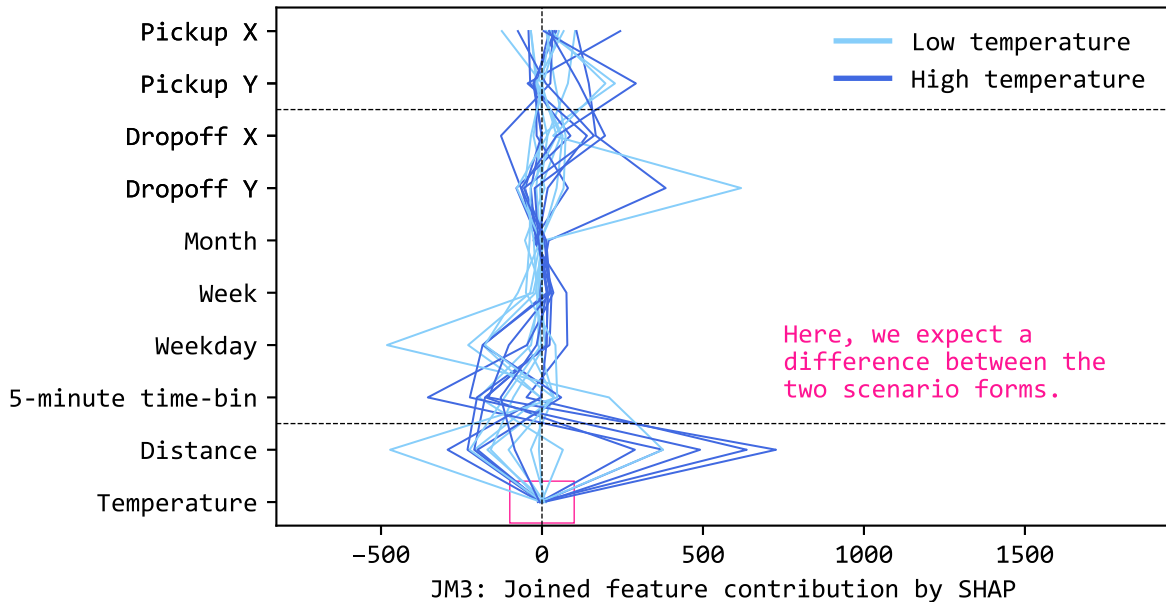

Supplement: f1 [file 9301691.f1.zip]

## SC4: Low vs. High Distance

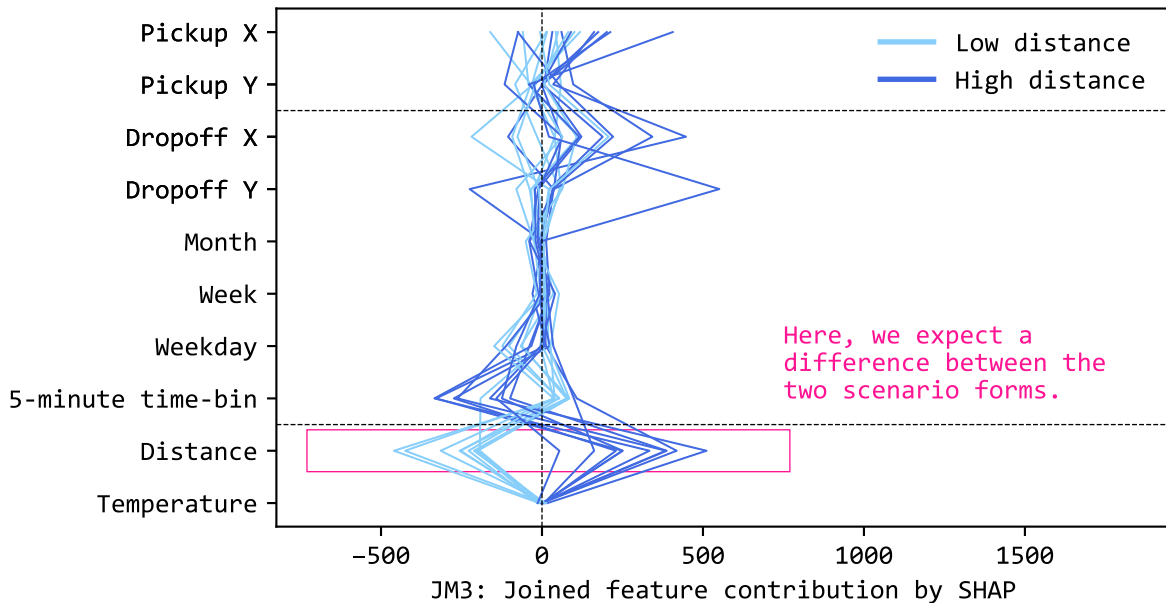

Supplement: f1 [file 9301691.f1.zip]

## SC1: Off City-Center vs. City-Center

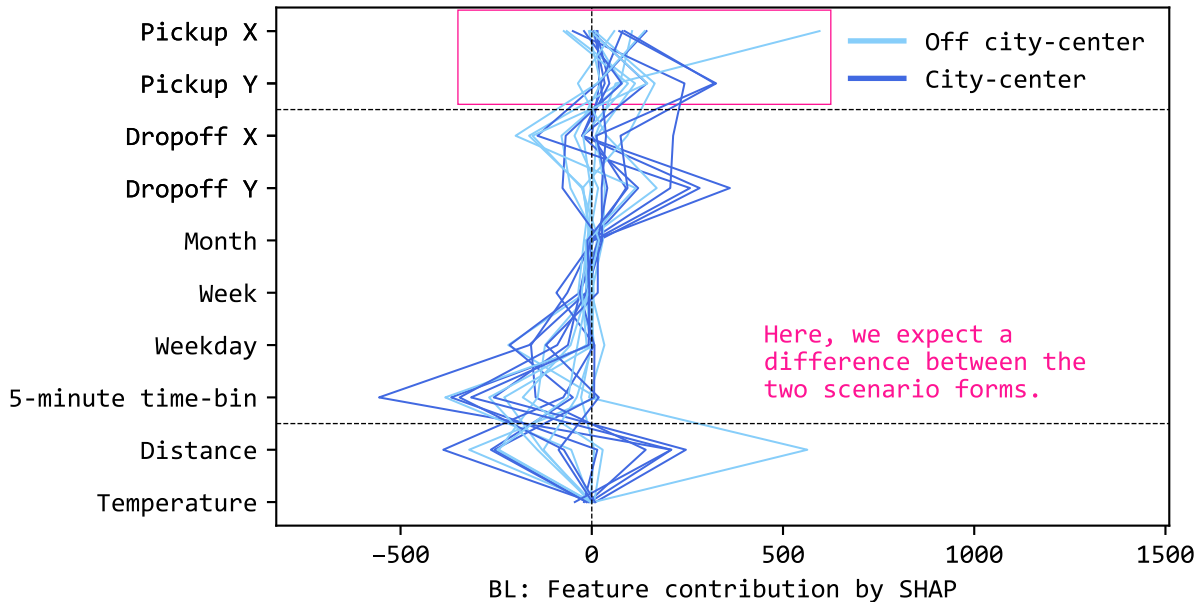

Supplement: f1 [file 9301691.f1.zip]

## SC1: Off City-Center vs. City-Center

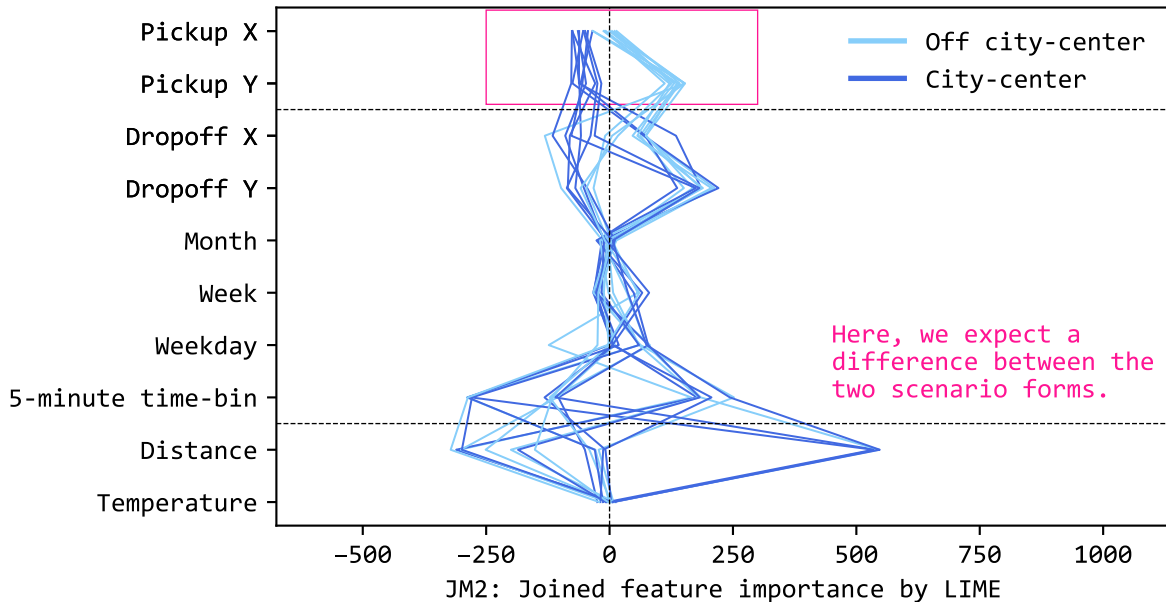

Supplement: f1 [file 9301691.f1.zip]

# SC1: Off City-Center vs. City-Center

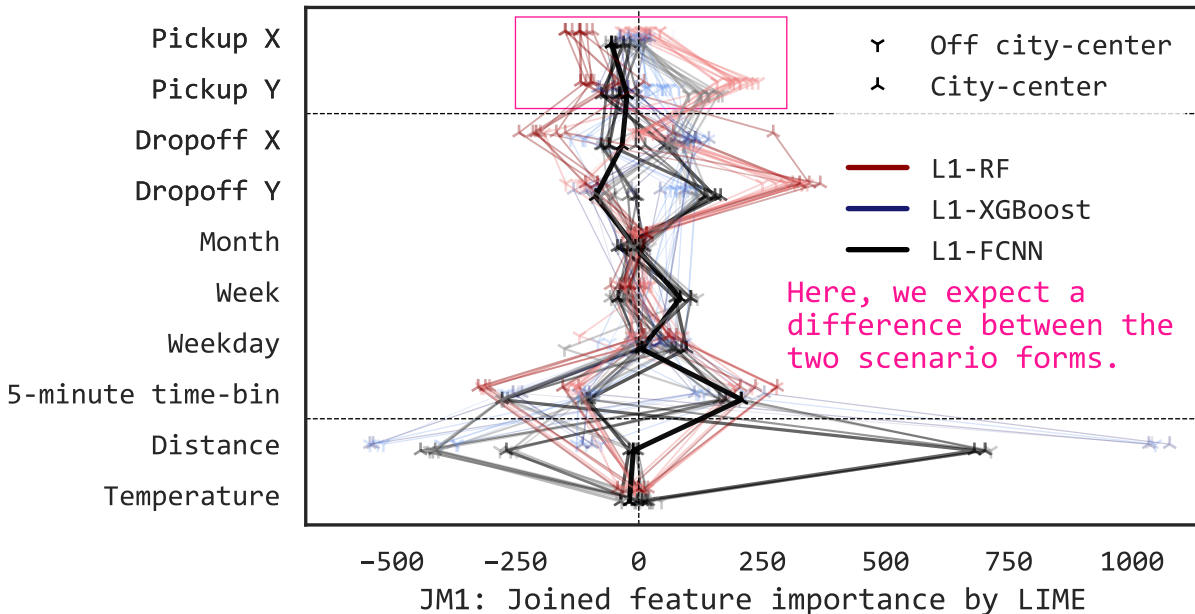

Supplement: f1 [file 9301691.f1.zip]

## SC4: Low vs. High Distance

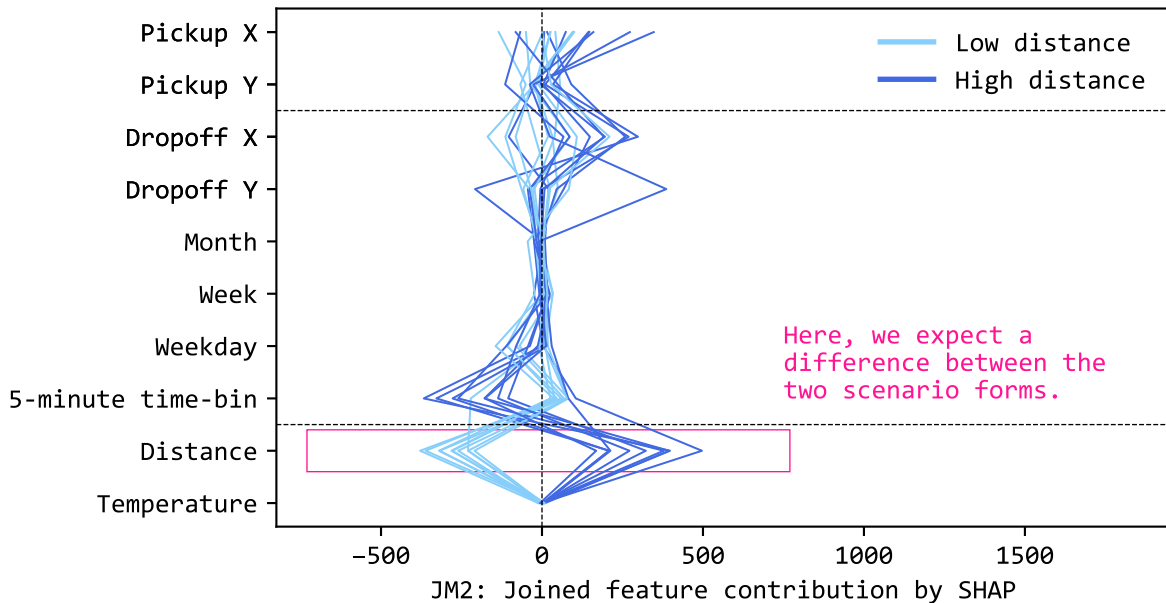

Supplement: f1 [file 9301691.f1.zip]

## SC1: Off City-Center vs. City-Center

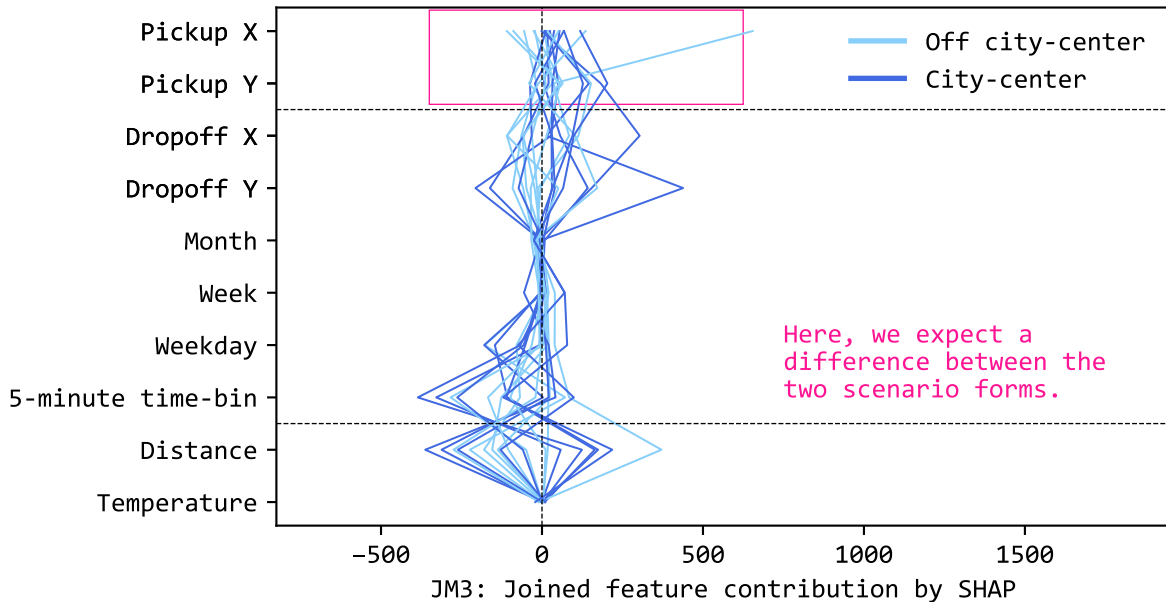

Supplement: f1 [file 9301691.f1.zip]

## SC4: Low vs. High Distance

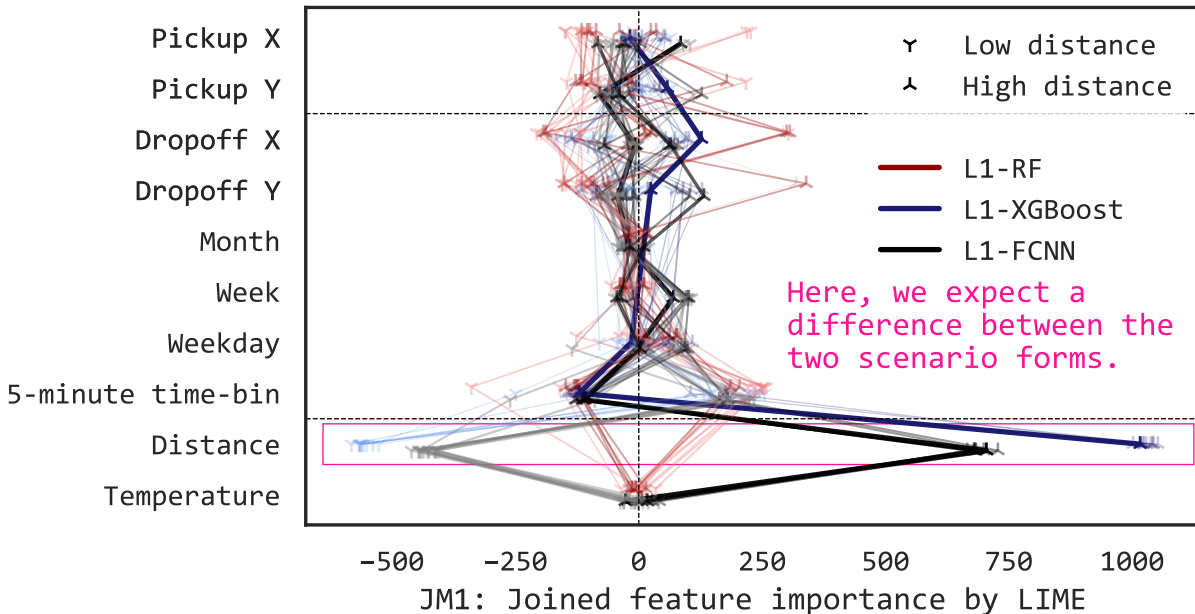

Supplement: f1 [file 9301691.f1.zip]

## SC4: Low vs. High Distance

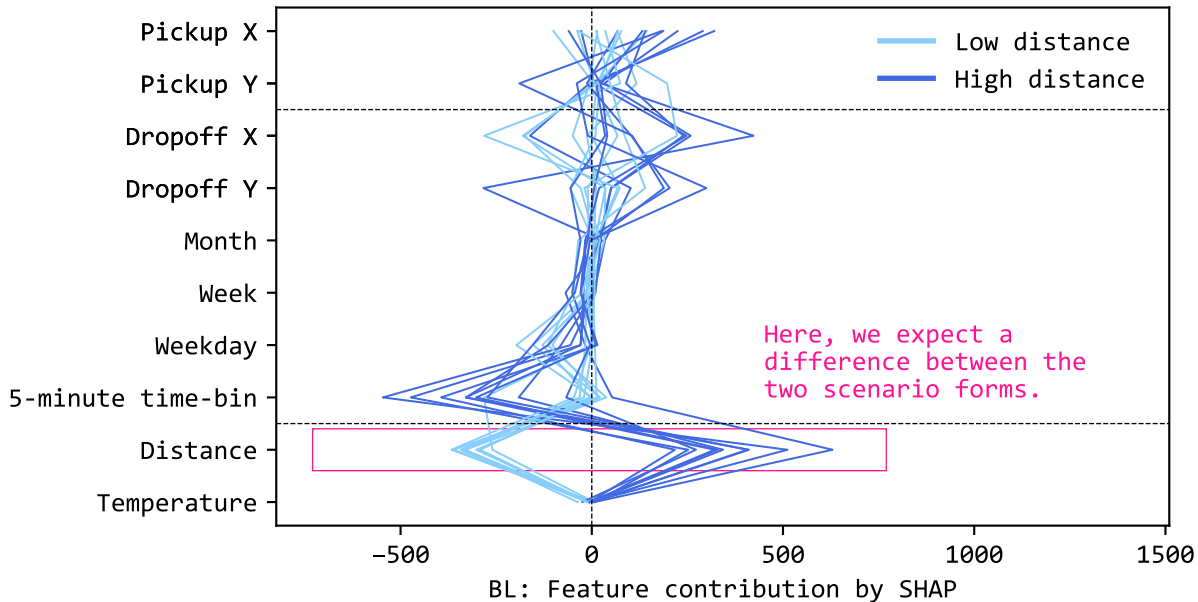

Supplement: f1 [file 9301691.f1.zip]

### SC3: Low vs. High Temperature

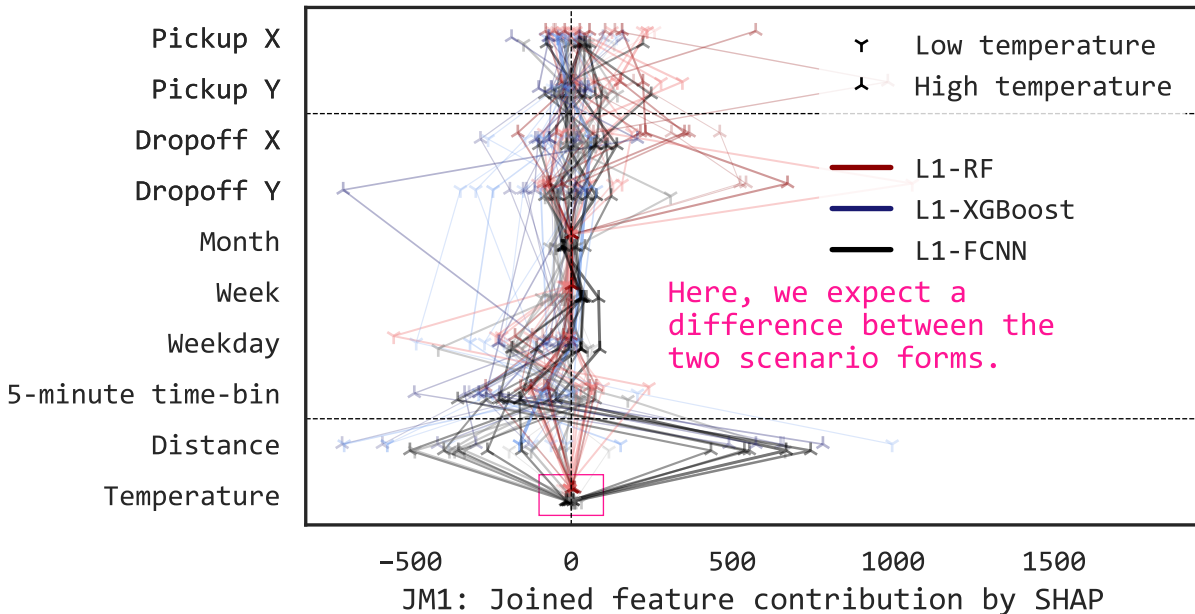

Supplement: f1 [file 9301691.f1.zip]

## SC4: Low vs. High Distance

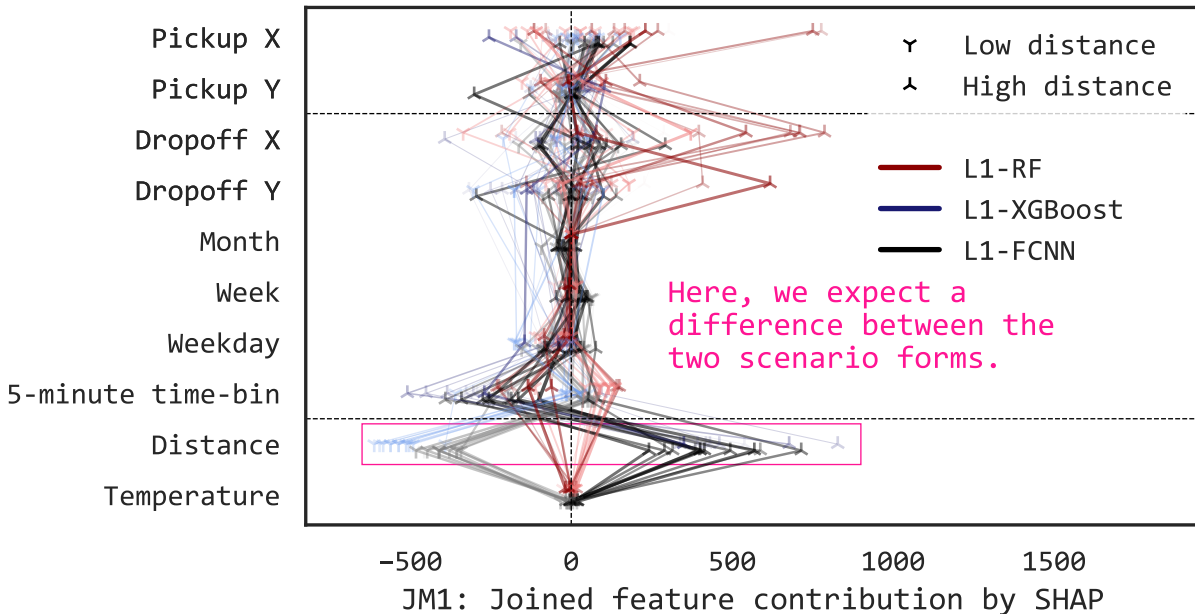

Supplement: f1 [file 9301691.f1.zip]

### SC3: Low vs. High Temperature

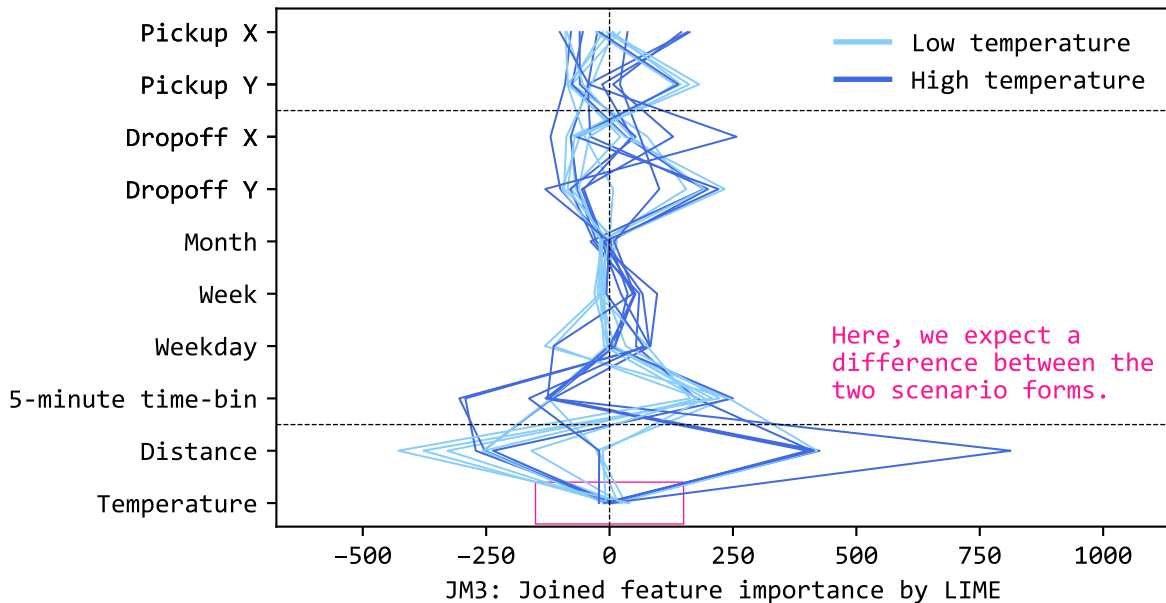

Supplement: f1 [file 9301691.f1.zip]

### SC3: Low vs. High Temperature

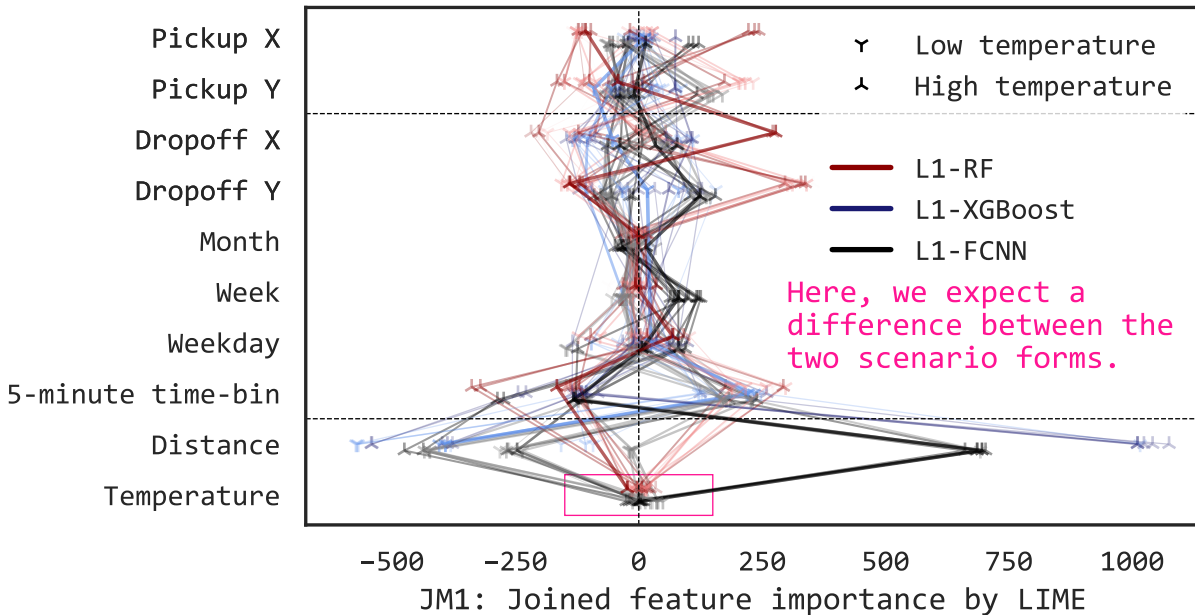

Supplement: f1 [file 9301691.f1.zip]

### SC3: Low vs. High Temperature

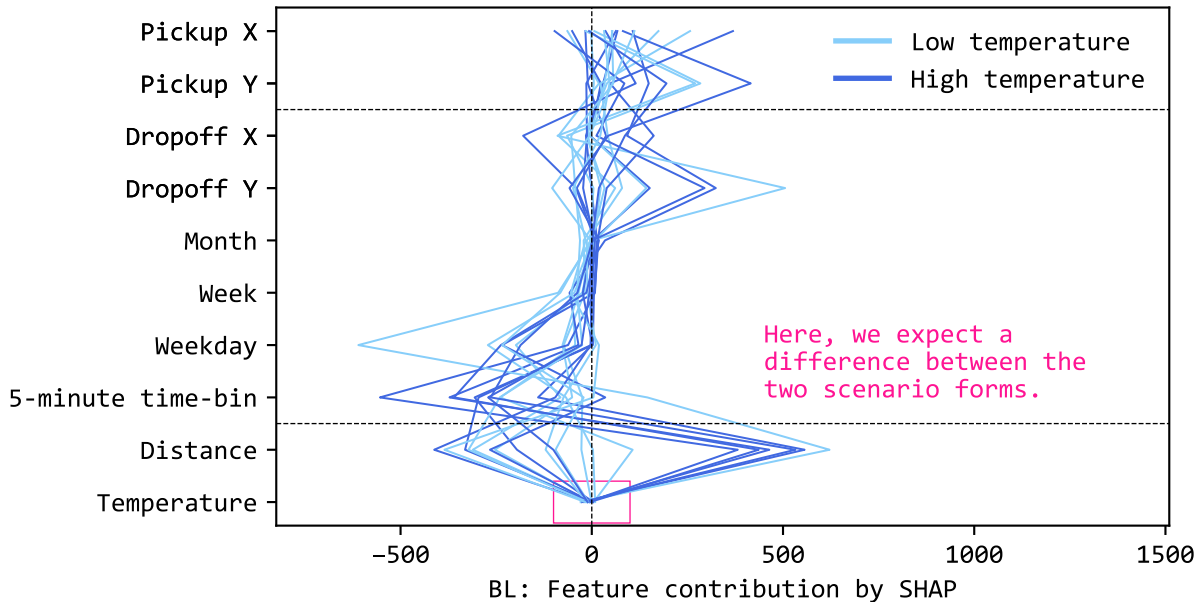

Supplement: f1 [file 9301691.f1.zip]

## SC1: Off City-Center vs. City-Center

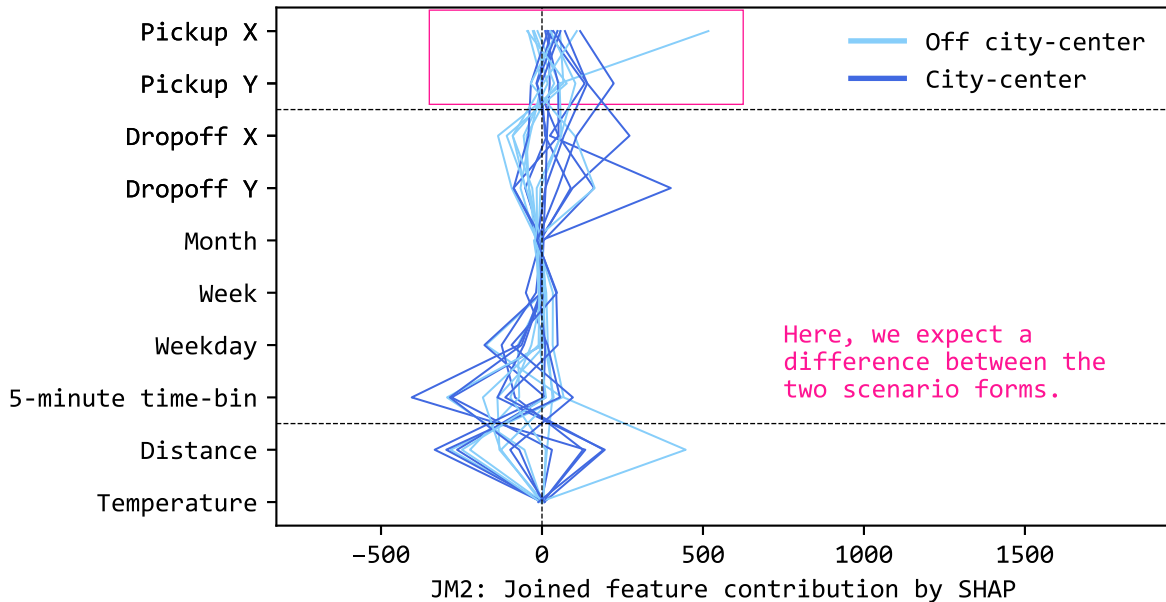

Supplement: f1 [file 9301691.f1.zip]

### SC3: Low vs. High Temperature

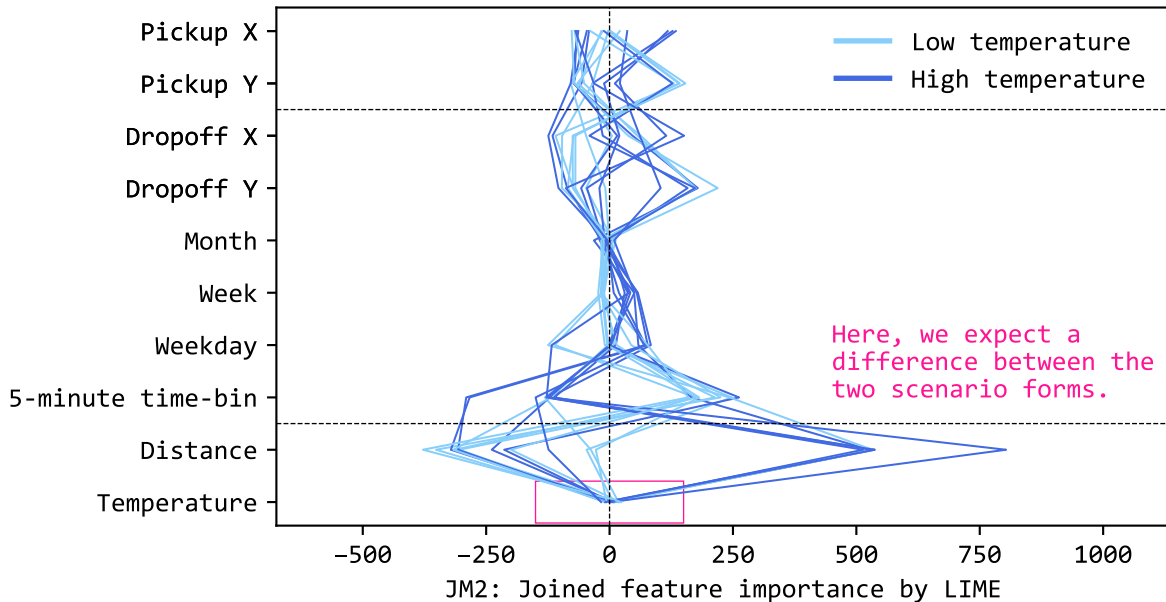

Supplement: f1 [file 9301691.f1.zip]

### SC3: Low vs. High Temperature

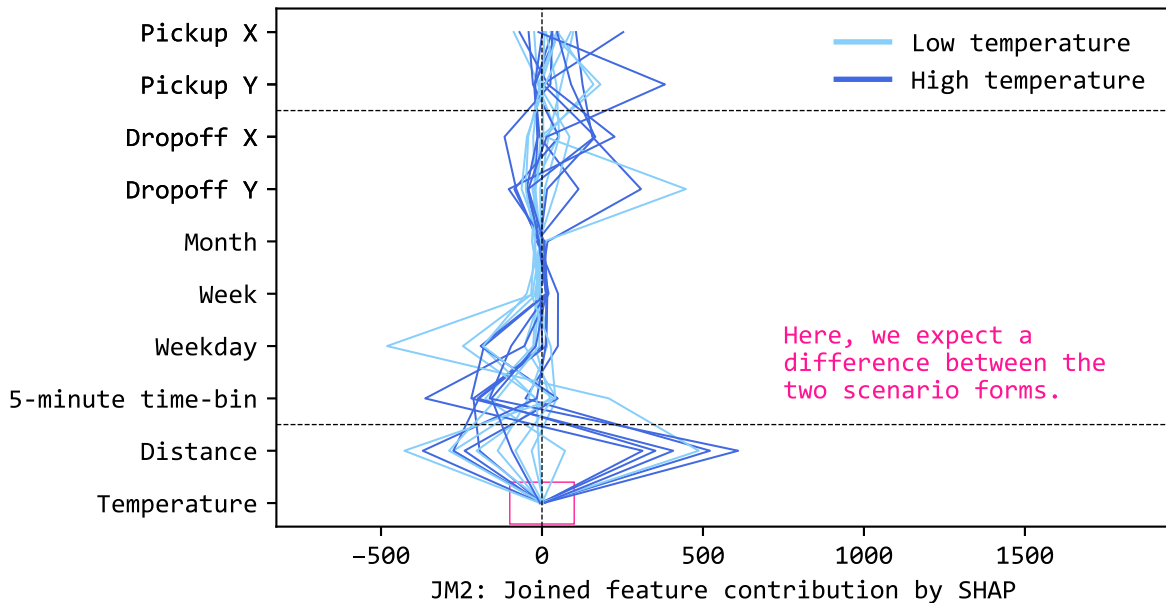

Supplement: f1 [file 9301691.f1.zip]

## SC4: Low vs. High Distance

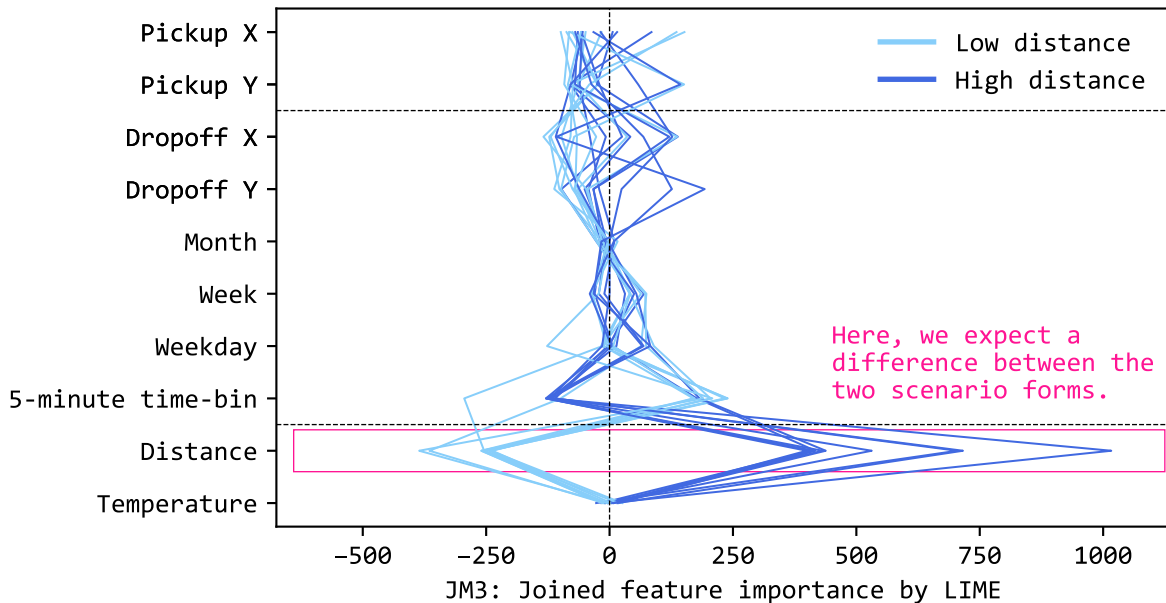

Supplement: f1 [file 9301691.f1.zip]

### SC3: Low vs. High Temperature

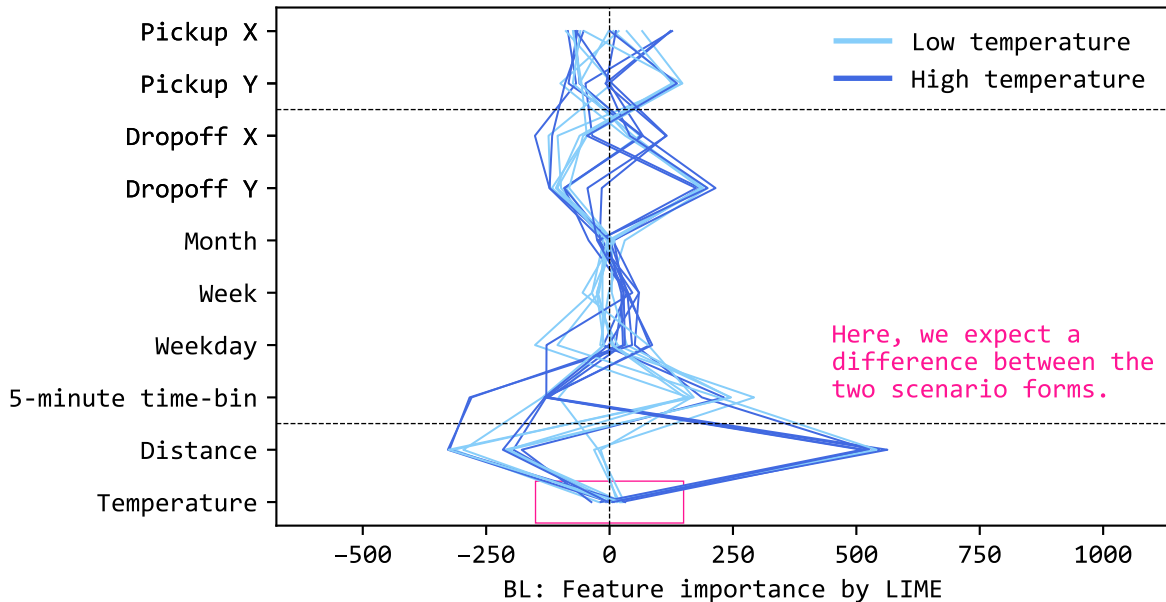

Supplement: f1 [file 9301691.f1.zip]

## SC1: Off City-Center vs. City-Center

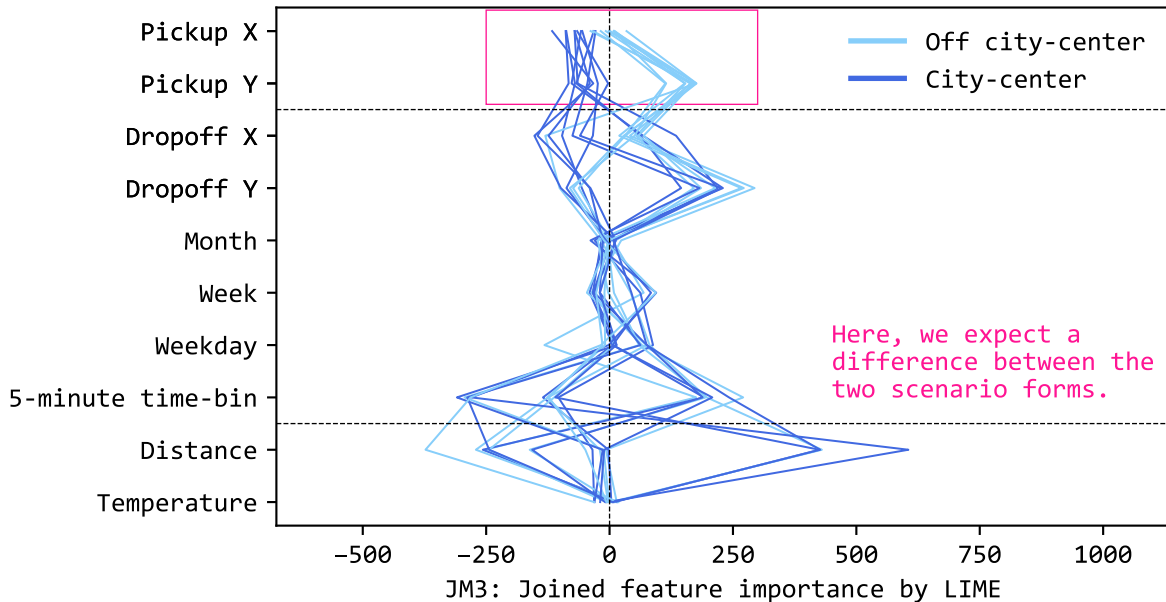

Supplement: f1 [file 9301691.f1.zip]

## SC4: Low vs. High Distance

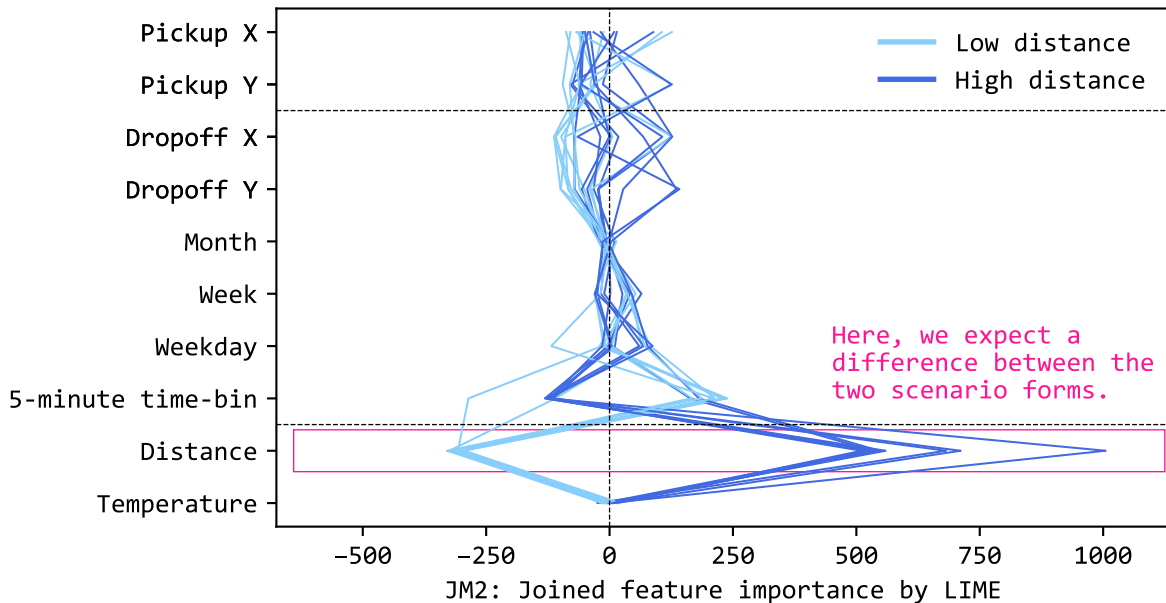

Supplement: f1 [file 9301691.f1.zip]

## SC4: Low vs. High Distance

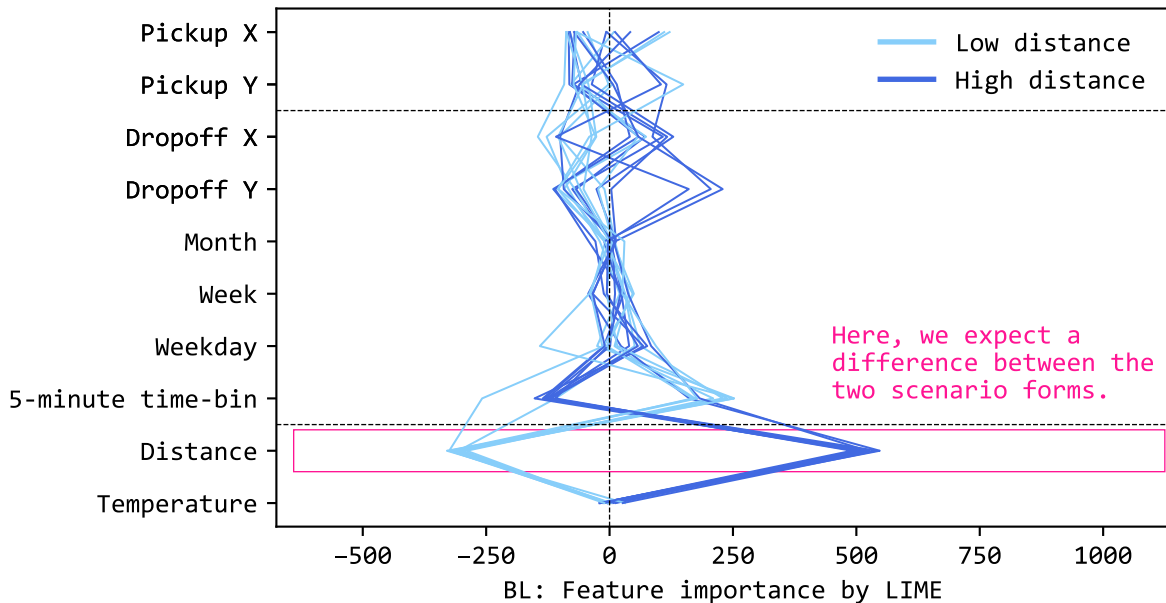

Supplement: f1 [file 9301691.f1.zip]

# SC1: Off City-Center vs. City-Center

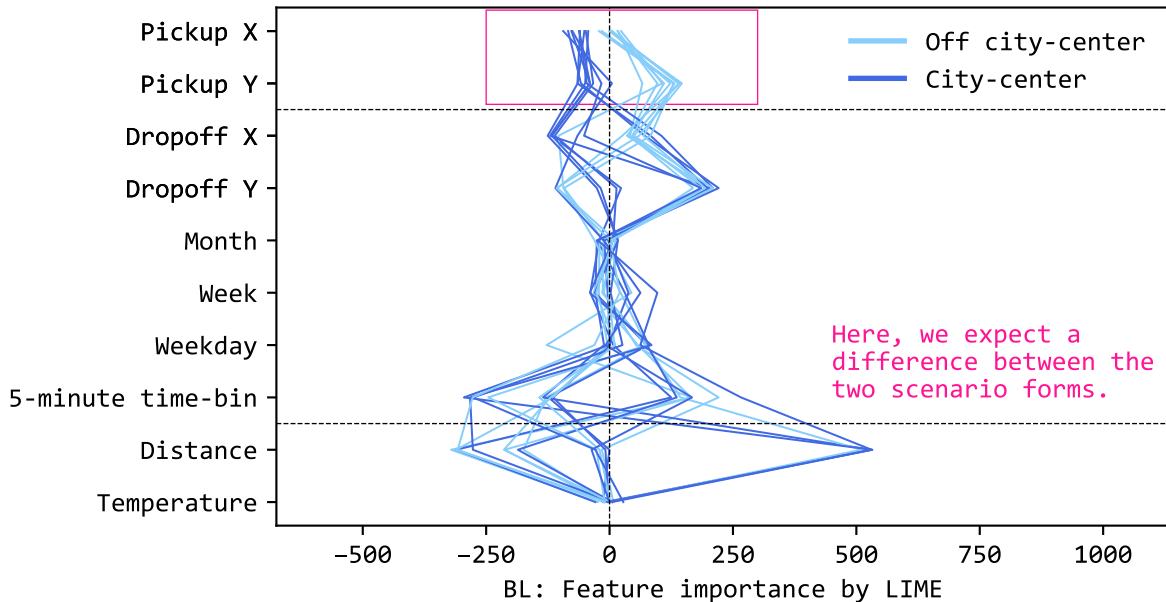

Supplement: f1 [file 9301691.f1.zip]
